# Supplementary material for: Efficacy of L-arginine and Pycnogenol ® in the treatment of male erectile dysfunction: a systematic review and meta-analysis
Source: PubMed Central journal article supplement (PMC10614297; doi:10.3389/fendo.2023.1211720), 2023-10-04
Supplement: DataSheet_1.pdf [file DataSheet_1.pdf]

Pubmed:

((("Arginine"[Mesh]) OR (Arginine[Title/Abstract])) AND (("pycnogenols" [Supplementary Concept]) OR (((((Pycnogenols[Title/Abstract]) OR (Pinus pinaster bark extract[Title/Abstract])) OR (French maritime pine bark extract[Title/Abstract])) OR (maritime pine bark extract[Title/Abstract])) OR (Pycnogenol[Title/Abstract]))) AND ("Erectile Dysfunction"[MeSH Terms] OR "Erectile Dysfunction"[Title/Abstract] OR "male impotence"[Title/Abstract] OR "male sexual impotence"[Title/Abstract] OR "Impotence"[Title/Abstract]))

Web of Science:

TS=(Erectile Dysfunction OR male impotence OR male sexual impotence OR Impotence) AND TS=(Arginine) AND TS=(pycnogenols OR Pinus pinaster bark extract OR French maritime pine bark extract OR maritime pine bark extract OR Pycnogenol)

Embase:

#1 'erectile dysfunction':ab,ti OR 'male impotence':ab,ti OR 'male sexual impotence':ab,ti OR impotence:ab,ti

#2 arginine:ab,ti

#3 pycnogenols:ab,ti OR 'pinus pinaster bark extract':ab,ti OR 'french maritime pine bark extract':ab,ti OR 'maritime pine bark extract':ab,ti OR pycnogenol:ab,ti

#1 AND #2 AND #3

Cochrane library:

#1 MeSH descriptor: [Erectile Dysfunction] explode all trees

#2 (Erectile Dysfunction OR male impotence OR male sexual impotence OR Impotence):ti,ab,kw

#3 #1 or #2

#4 MeSH descriptor: [Arginine] explode all trees

#5 (Arginine):ti,ab,kw

#6 #4 or #5

#7 (pycnogenols OR Pinus pinaster bark extract OR French maritime pine bark extract OR maritime pine bark extract OR Pycnogenol):ti,ab,kw

#8 #3 and #6 and #7

Chinese National Knowledge Infrastructure (CNKI):

(主题: 勃起功能障碍 (精确)) OR (篇文摘: 阳痿 (精确)) AND ((主题: 精氨酸 (精确)) OR (篇文摘: 精氨酸 (精确))) AND ((主题: 碧容健 (精确)) OR (篇文摘: 碧萝芷 (精确)) OR (篇文摘: 松树皮提取物 (精确)) OR (篇文摘: 松树皮萃取物 (精确)))

Wanfang database:

主题:(("勃起功能障碍" or "阳痿") and ("精氨酸") and ("碧萝芷" or "碧容健" or "松树皮提取物" or "松树皮萃取物"))

VIP database:

M=(勃起功能障碍 OR 阳痿) AND M=(精氨酸) AND M=(碧萝芷 OR 碧容健 OR 松树皮提取物 OR 松树皮萃取物)
